# Supplementary material
Source: HighWire-hosted journal article supplement (https://bmjopen.bmj.com/content/15/2/e092504)
Supplement: inline-supplementary-material-3 [file inline-supplementary-material-3.pdf]

Supplemental File 3 - Schedule of Assessments

| Week                                 | 0 | 1     | 2                           |       | 3                           |       | 4                           |                  | 5  | 8* | 12 | 24  |
|--------------------------------------|---|-------|-----------------------------|-------|-----------------------------|-------|-----------------------------|------------------|----|----|----|-----|
| Visit Number                         | 1 | 2     | 3                           | 4     | 5                           | 6     | 7                           | 8                | 9  | 10 | 11 | 12  |
| Day                                  | 0 | 1     | 5/6                         | 7     | 12/13                       | 14    | 19/20                       | 21               | 28 | 56 | 84 | 168 |
| Intervention                         |   | CBT 1 | KET 1                       | CBT 2 | KET 2                       | CBT 3 | KET 3                       | CBT 4            |    |    |    |     |
| Informed Consent                     | x |       |                             |       |                             |       |                             |                  |    |    |    |     |
| MINI <sup>a</sup>                    | x |       |                             |       |                             |       |                             |                  |    |    |    |     |
| C-SSRS-6                             | x |       |                             |       |                             |       |                             |                  |    |    |    |     |
| Medical assessment                   | x |       |                             |       |                             |       |                             |                  |    |    |    |     |
| Concomitant Medications              | x |       | x                           |       | x                           |       | x                           |                  | x  | x  | x  | x   |
| Other Psychological care             | x |       | x                           |       | x                           |       | x                           |                  | x  | x  | x  | x   |
| Height, weight                       | x |       | x                           |       | x                           |       | x                           |                  |    |    |    |     |
| Vital signs <sup>b</sup>             | x |       | x <sup>0, 15, 60, 120</sup> |       | x <sup>0, 15, 60, 120</sup> |       | x <sup>0, 15, 60, 120</sup> |                  | x  | x  | x  | x   |
| POC – Urine Drug Screen <sup>c</sup> | x |       | x <sup>PRE</sup>            |       | x <sup>PRE</sup>            |       | x <sup>PRE</sup>            |                  | x  | x  | x  | x   |
| Urinary Hcg (if applicable)          | x |       | x <sup>PRE</sup>            |       | x <sup>PRE</sup>            |       | x <sup>PRE</sup>            |                  | x  | x  | x  | x   |
| Eligibility                          | x |       |                             |       |                             |       |                             |                  |    |    |    |     |
| Demographics                         | x |       |                             |       |                             |       |                             |                  |    |    |    |     |
| SURGE                                | x |       |                             |       |                             |       |                             |                  |    |    |    |     |
| WURS                                 | x |       |                             |       |                             |       |                             |                  |    |    |    |     |
| TLFB - MA                            | x |       | x                           |       | x                           |       | x                           |                  | x  | x  | x  | x   |
| VAS-C for MA                         | x |       | x                           |       | x                           |       | x                           |                  | x  | x  | x  | x   |
| AWQ                                  | x |       |                             |       |                             |       |                             |                  | x  | x  | x  | x   |
| WHOQOL-BREF                          | x |       |                             |       |                             |       |                             |                  | x  | x  | x  | x   |
| TSQM-II                              |   |       |                             |       |                             |       |                             |                  | x  | x  |    |     |
| CSQ-8                                |   |       |                             |       |                             |       |                             |                  | x  | x  |    |     |
| Medical Review                       |   |       | x                           |       | x                           |       | x                           |                  |    | x  |    |     |
| Adverse Events                       |   | x     | x                           | x     | x                           | x     | x                           | x                | x  | x  | x  | x   |
| C-SSRS-SLV                           |   |       | x                           |       | x                           |       | x                           |                  | x  | x  | x  | x   |
| TLFB – ketamine                      | x |       | x                           |       | x                           |       | x                           |                  | x  | x  | x  | x   |
| TLFB – other substances              | x |       |                             |       |                             |       |                             |                  | x  | x  | x  | x   |
| VAS-C for Ketamine                   | x |       | x                           |       | x                           |       | x                           |                  | x  | x  | x  | x   |
| KSET – acute treatment               |   |       | x <sup>60, 120</sup>        |       | x <sup>60, 120</sup>        |       | x <sup>60, 120</sup>        |                  |    |    |    |     |
| YMRS                                 |   |       | x <sup>PRE, POST</sup>      |       | x <sup>POST</sup>           |       | x <sup>POST</sup>           |                  |    |    |    |     |
| CADSS-6                              |   |       | x <sup>POST</sup>           |       | x <sup>POST</sup>           |       | x <sup>POST</sup>           |                  |    |    |    |     |
| DEQ-5                                |   |       | x <sup>POST</sup>           |       | x <sup>POST</sup>           |       | x <sup>POST</sup>           |                  |    |    |    |     |
| HMS                                  |   |       | x <sup>POST</sup>           |       | x <sup>POST</sup>           |       | x <sup>POST</sup>           |                  |    |    |    |     |
| PHQ-9                                | x |       |                             |       |                             |       |                             |                  | x  | x  | x  | x   |
| GAD-7                                | x |       |                             |       |                             |       |                             |                  | x  | x  | x  | x   |
| DEERS                                | x |       |                             |       |                             |       |                             |                  | x  | x  | x  | x   |
| ISI                                  | x |       |                             |       |                             |       |                             |                  | x  | x  | x  | x   |
| SUSI                                 | x |       |                             |       |                             |       |                             |                  | x  | x  | x  | x   |
| Emotional N-back task                | x |       |                             |       |                             |       |                             | x <sup>PRE</sup> |    |    |    |     |
| Emotional Stroop                     | x |       |                             |       |                             |       |                             | x <sup>PRE</sup> |    |    |    |     |
| Qualitative Interview <sup>d</sup>   |   |       |                             |       |                             |       |                             |                  | x  |    |    |     |

\*Primary Endpoint **AWQ** Amphetamine Withdrawal Questionnaire **CADSS-6** Clinician Administered Dissociation States Scales **C-SSRS** Columbia-Suicide Severity Rating Scale **C-SSRS** Columbia-Suicide Severity Rating Scale – Since Last Visit **CSQ-8** Client Satisfaction Questionnaire **DEERS** Difficulties in Emotion Regulation Scale **DEQ-5** Drug Effects Questionnaire **GAD-7** Generalised Anxiety Disorder Scale-7 **HMS** Hood Mysticism Scale **ISI** Insomnia Severity Index **KSET** Ketamine Side Effect Tool **MA** Methamphetamine **MINI** Mini-International Neuropsychiatric Interview **PHQ-9** Patient Health Questionnaire **POC** Point of Care **SURGE** Substance Use Goals and Expectations **SUSI** Substance Use & Sex Index **TLFB** Timeline Follow-Back **TSQM-II** Treatment Satisfaction Questionnaire for Medication

**VAS-C** Visual Analogue Scale – Craving **WURS** Wender-Utah Rating Scale **WHOQOL-BREF** World Health Organisation Quality of Life Brief Version **YMRS** Young Mania Rating Scale

(a) MINI modules A (major depressive disorder), C (bipolar disorder), I and J (alcohol and substance use disorders), K (current psychotic disorder), O (rule out medical, organic or drug causes), (b) Blood pressure, heart rate, oxygen saturations, respiratory rate (c) POC also considered a measure of efficacy (d) Qualitative interviews (optional) will be conducted during Week 5 to Week 8.
